# Supplementary material
Source: publisher figshare collection journal article supplement (https://acs.figshare.com/ndownloader/files/3853837)
Supplement: Supplementary file 1 [file 3853837]

# Ligand 5,10,15,20-Tetra(*N*-methyl-4-pyridyl)porphine (TMPyP4) Prefers the Parallel Propeller-Type Human Telomeric G-Quadruplex DNA over Its Other Polymorphs

Asfa Ali,<sup>†</sup> Manju Bansal,<sup>§</sup> and Santanu Bhattacharya<sup>\*,†,‡</sup>

<sup>†</sup>Department of Organic Chemistry, Indian Institute of Science, Bangalore 560 012, India.

<sup>‡</sup>Jawaharlal Nehru Centre for Advanced Scientific Research, Bangalore 560 064, India.

<sup>§</sup>Molecular Biophysics Unit, Indian Institute of Science, Bangalore 560 012, India.

**Supporting Information**

**Table S1.** A comparative study of the “blind” docking of TMPyP4 to different G-quadruplex DNA.

|                 | Number of Runs | Clustering | L.B.E. | M.B.E. | Site of Binding |
|-----------------|----------------|------------|--------|--------|-----------------|
| PP <sub>0</sub> | 150            | 61         | -7.70  | -7.46  | End-stacking    |
| AB <sub>0</sub> | 150            | 73         | -5.90  | -5.77  | Groove binding  |
| MH <sub>0</sub> | 150            | 145        | -5.48  | -5.35  | Groove binding  |

PP<sub>0</sub>, AB<sub>0</sub>, MH<sub>0</sub> = complexes formed due to blind docking of TMPyP4 to PP, AB, and MH, respectively, L.B.E. = lowest binding energy in kcal mol<sup>-1</sup>, M.B.E. = mean binding energy in kcal mol<sup>-1</sup>.

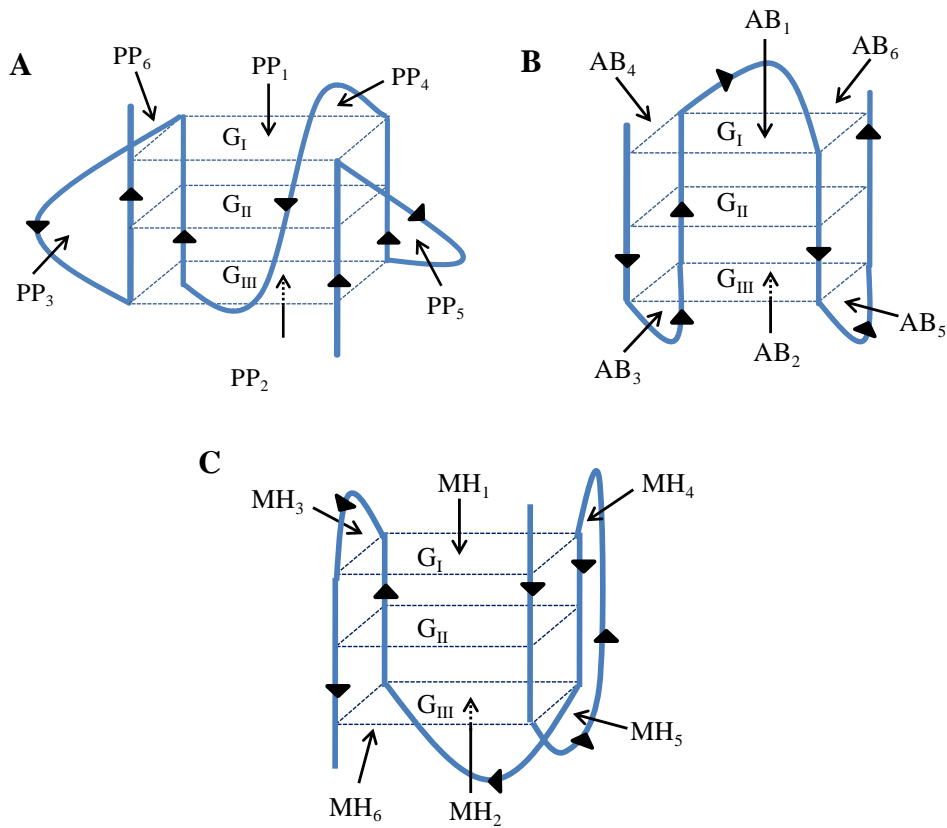

**Figure S1.** Probable binding positions of the 22-mer human telomeric G-quadruplex DNA. (A) binding sites of parallel propeller-type (PP) G-quadruplex DNA: PP<sub>1</sub>, PP<sub>2</sub> = two end-stacking positions, PP<sub>3</sub>-PP<sub>6</sub> = four groove binding positions; (B) binding sites of antiparallel basket-type (AB) G-quadruplex DNA: AB<sub>1</sub>, AB<sub>2</sub> = two end-stacking positions, AB<sub>3</sub>-AB<sub>6</sub> = four groove binding positions; (C) binding sites of mixed hybrid-type (MH) G-quadruplex DNA: MH<sub>1</sub>, MH<sub>2</sub> = two end-stacking positions, MH<sub>3</sub>-MH<sub>6</sub> = four groove binding positions. G<sub>I</sub>, G<sub>II</sub>, and G<sub>III</sub> are the three G-tetrads in the native G-quadruplex DNA.

**Table S2.** Hydrogen bond occurrence<sup>a</sup> during the final molecular dynamics simulation for 50 ns for different G-quadruplex DNAs.

|     | PP          |            | AB          |            | MH          |            |
|-----|-------------|------------|-------------|------------|-------------|------------|
|     | N2-H21...N7 | N1-H1...O6 | N2-H21...N7 | N1-H1...O6 | N2-H21...N7 | N1-H1...O6 |
| G2  | 95.4        | 99.1       | 99.3        | 98.7       | 99.6        | 99.9       |
| G3  | 99.5        | 92.6       | 99.4        | 81.5       | 99.8        | 97.2       |
| G4  | 99.1        | 98.9       | 99.7        | 100.0      | 98.7        | 99.7       |
| G8  | 97.9        | 98.8       | 98.4        | 99.6       | 96.1        | 99.6       |
| G9  | 99.3        | 96.3       | 99.3        | 97.8       | 99.9        | 96.4       |
| G10 | 98.3        | 98.8       | 99.3        | 98.7       | 99.6        | 99.8       |
| G14 | 98.8        | 99.3       | 99.5        | 99.7       | 99.6        | 99.8       |
| G15 | 99.5        | 95.1       | 100.0       | 97.0       | 100.0       | 95.3       |
| G16 | 98.3        | 98.8       | 96.1        | 99.8       | 99.7        | 99.8       |
| G20 | 99.6        | 99.9       | 99.9        | 100.0      | 99.9        | 99.7       |
| G21 | 99.8        | 97.1       | 98.8        | 85.9       | 99.9        | 98.5       |

PP = parallel propeller-type, AB = antiparallel basket-type, and MH = mixed hybrid-type quadruplex DNA. GX = guanine bases in the 22-mer sequence used where X = residue number. <sup>a</sup>All the values are shown in percentages.
